# Supplementary material
Source: publisher figshare collection journal article supplement (https://springernature.figshare.com/ndownloader/files/42077154)

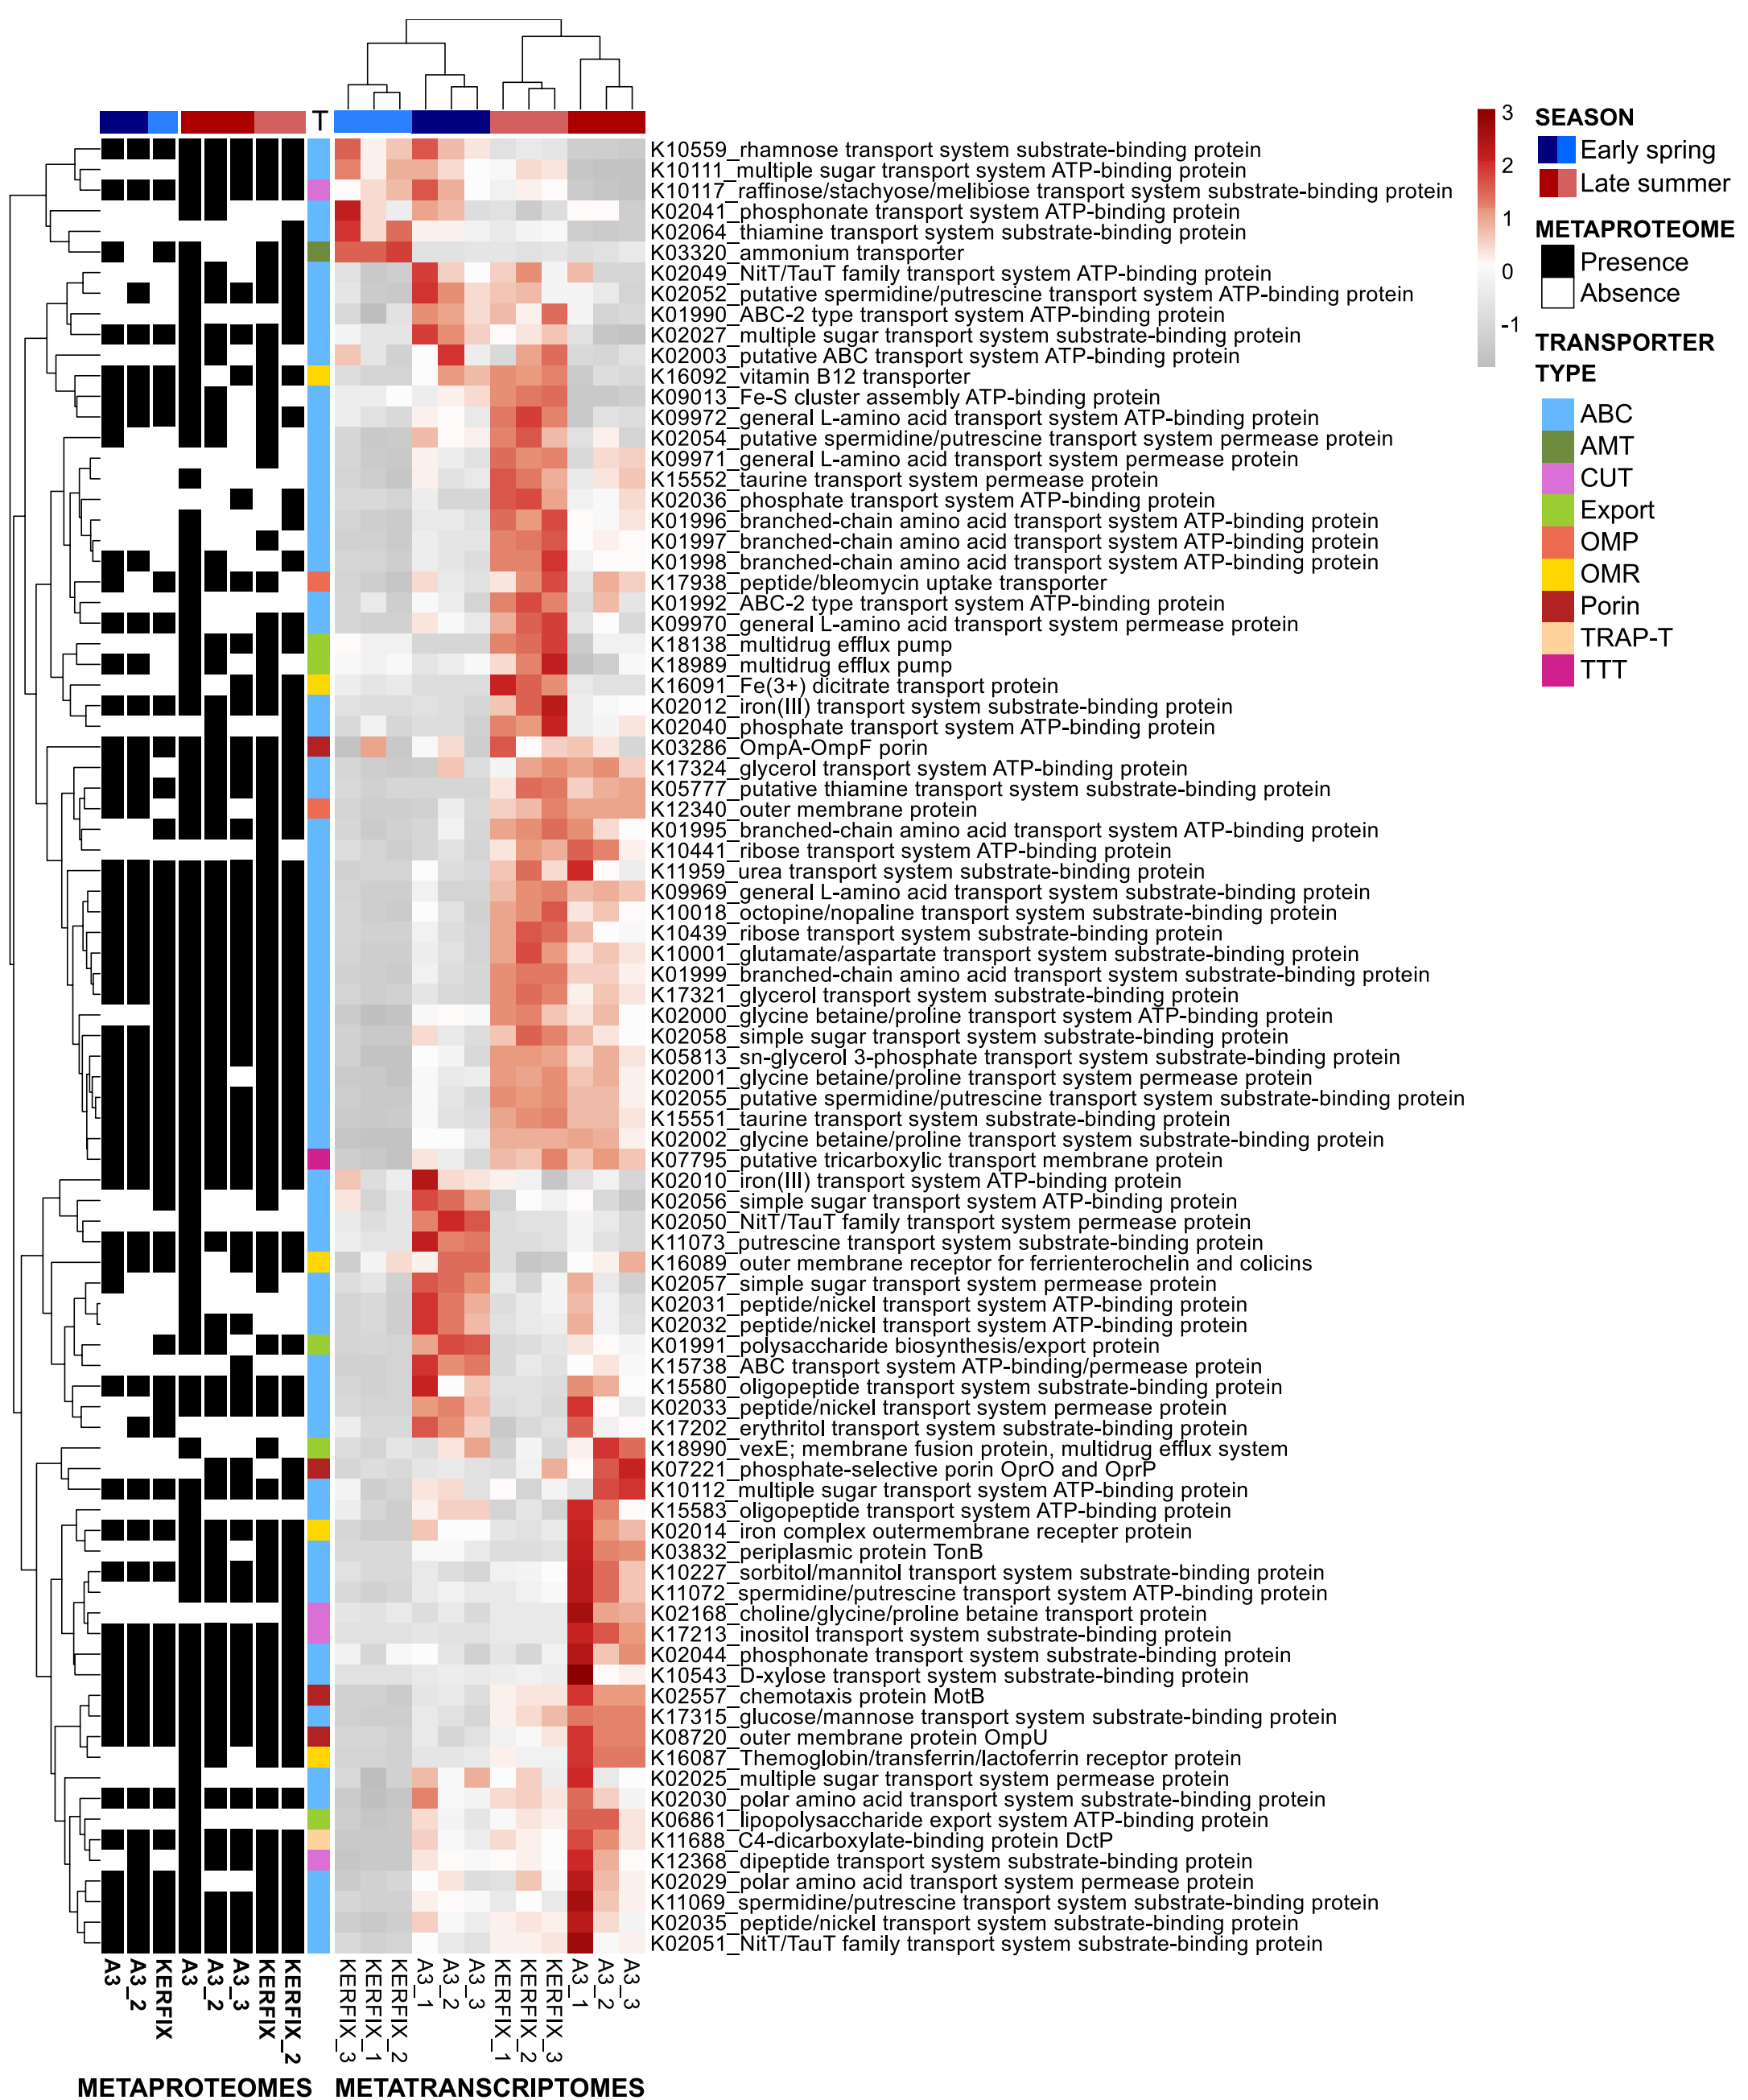

Supplement: Supplementary file [file 42077154]
